# Supplementary material
Source: HighWire-hosted journal article supplement (http://dmd.aspetjournals.org/highwire/filestream/66297/field_highwire_adjunct_files/2/Supplemental_Figure_3_53611.pdf)
Supplement: Supplemental_Figure_3_53611.pdf [file Supplemental_Figure_3_53611.pdf]

*Supplemental Figure 3*

Relationship between CYP1A2 Localization and Lipid Microdomain Formation as a Function of Lipid Composition

Lauren Brignac-Huber, James R. Reed, Marilyn K. Eyer, and Wayne L. Backes

Drug Metabolism and Disposition DMD/2013/053611

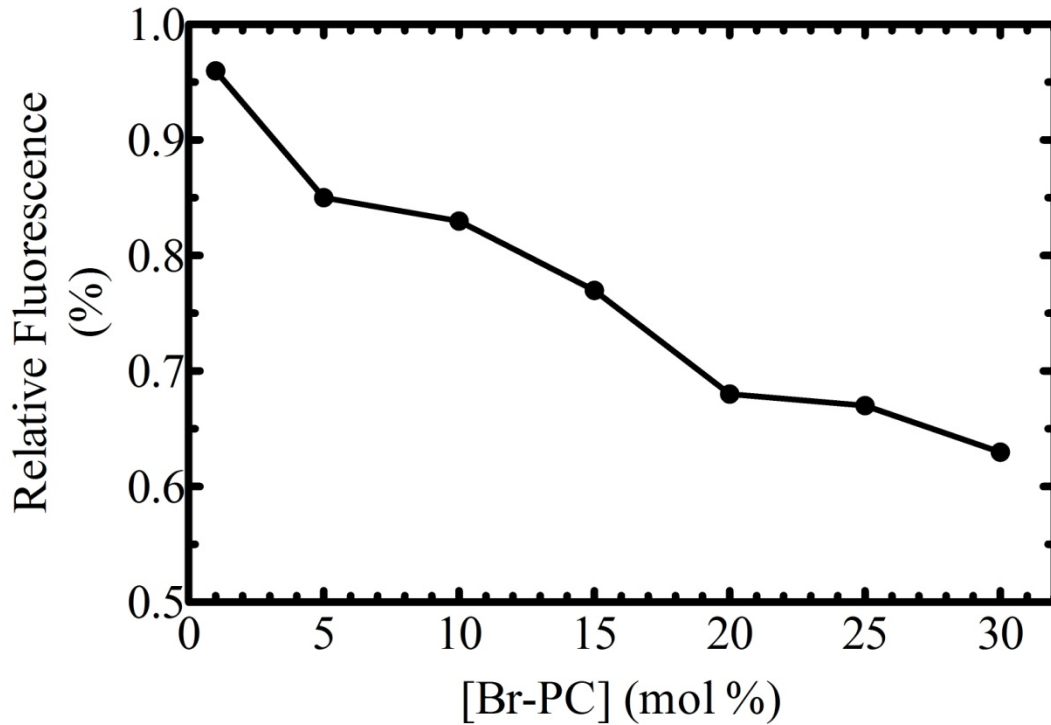

**Supplemental Figure 3. Br-PC titration into V-PC to measure CYP1A2 tryptophan fluorescence quenching.** Increasing concentrations (mol%) of Br-PC were titrated into V-PC systems with 5 $\mu$ M CYP1A2. CYP1A2 tryptophan was monitored (ex 290nm/ em 341 nm) in the presence and absence of Br-PC to determine the change in tryptophan fluorescence at each Br-PC concentration.
